# Supplementary material
Source: PubMed Central journal article supplement (PMC3707697)
Supplement: supp_M113.454652_jbc.M113.454652-2.pdf [file supp_M113.454652_jbc.M113.454652-2.pdf]

### **SUPPLEMENTARY FIGURE 1**

Time course of changes in body weight (A, B) and lengths of femur and tibia (C-F) of *Ccn3* Tg mice (A, C, E) and *Ccn3* KO mice (B, D, F). Closed bars represent the body weight of *Ccn3* mutant mice, and open bars show that in wild-type mice.
